# Supplementary material
Source: HighWire-hosted journal article supplement (https://bmjopen.bmj.com/content/8/7/e021784)
Supplement: inline-supplementary-material-2 [file inline-supplementary-material-2.pdf]

Supplementary Information 2 – Description of selected studies (n = 70)

| Study            | Data    |               |                     | Patient Sample  |                             |             | Comorbid Conditions                                                | Outcomes                                                                                                                                                                                                                                                                                                                  |
|------------------|---------|---------------|---------------------|-----------------|-----------------------------|-------------|--------------------------------------------------------------------|---------------------------------------------------------------------------------------------------------------------------------------------------------------------------------------------------------------------------------------------------------------------------------------------------------------------------|
|                  | Country | Years of data | Data source         | Type of surgery | Primary or Revision surgery | Sample Size |                                                                    |                                                                                                                                                                                                                                                                                                                           |
| Ackland (2011)   | UK      | 2004-2005     | Single-site         | THA and TKA     | Primary & Revision          | 526         | Chronic Kidney disease                                             | Infection, Pain, Postoperative morbidity                                                                                                                                                                                                                                                                                  |
| Adams (2013)     | USA     | 2001-2009     | Joint registry      | TKA             | Primary                     | 40,491      | Controlled diabetes                                                | All-cause rehospitalizations, Deep Infection, Deep vein thrombosis, Revisions                                                                                                                                                                                                                                             |
| Aggarwal (2013)  | USA     | 2007-2011     | Single-site         | THA and TKA     | Primary & Revision          | 323         | Atrial Fibrillation                                                | Readmission rate                                                                                                                                                                                                                                                                                                          |
| Amusat (2014)    | Canada  | NS            | Multi-site          | TKA             | Primary                     | 405         | Diabetes without impact on routine activities, Kidney Disease      | Overall health (HUI3) -6m post-operative, WOMAC function, WOMAC pain                                                                                                                                                                                                                                                      |
| Ayers (2005)     | USA     | NS            | Single-site         | TKA             | Primary                     | 165         | Lower extremity (PVD, venous insufficiency)                        | Mean change in Physical Function (SF-36) 12mths post surgery, Mean change in Physical Function (WOMAC) 12mths post surgery                                                                                                                                                                                                |
| Belmont (2016)   | USA     | 2011-2012     | Multi-site          | TKA             | Revision                    | 1754        | Cardiac disease, COPD, CVA/Stroke, Diabetes, Hypertension          | Readmissions within 30 days                                                                                                                                                                                                                                                                                               |
| Bolognesi (2008) | USA     | 1988-2003     | Administrative data | THA and TKA     | Primary & Revision          | 2,249,427   | Diabetes                                                           | DVT, Died, Infection                                                                                                                                                                                                                                                                                                      |
| Browne (2014)    | USA     | 2006-2008     | Administrative data | THA and TKA     | Primary                     | 497,222     | Depression                                                         | Infection, Pulmonary embolism                                                                                                                                                                                                                                                                                             |
| Buller (2015)    | USA     | 1990-2007     | Administrative data | THA and TKA     | Primary                     | 8,379,490   | Chronic pulmonary disease, CAD, Depression, Diabetes, Hypertension | Adverse Events (wound complication , postoperative shock, postoperative bleeding, acute postoperative infection, acute postoperative anemia, acute renal failure, acute myocardial infarction, pulmonary embolism, induced mental disorder, pneumonia, pulmonary insufficiency, DVT, intubation and transfusion of blood) |
| Chan (2005)      | UK      | 2000-2003     | Single-site         | THA             | NS                          | 1,297       | Diabetes                                                           | Deep Infection, Deep vein thrombosis                                                                                                                                                                                                                                                                                      |
| Clement (2013)   | UK      | NS            | Single-site         | TKA             | Primary                     | 2,389       | Depression, Diabetes, Heart disease, High blood pressure,          | Post-operative OKS at 12mths, post-operative SF-12 at 12mths                                                                                                                                                                                                                                                              |

|                   |           |           |                     |             |         |         |                                                                                                           |                                                                                                                                                                    |
|-------------------|-----------|-----------|---------------------|-------------|---------|---------|-----------------------------------------------------------------------------------------------------------|--------------------------------------------------------------------------------------------------------------------------------------------------------------------|
|                   |           |           |                     |             |         |         | Kidney disease, Lung disease, Neurological diseases, Vascular disease                                     |                                                                                                                                                                    |
| Cohen (2005)      | USA       | 1986-2002 | Single-site         | THA and TKA | Primary | 122     | Liver cirrhosis                                                                                           | Death, Major complications                                                                                                                                         |
| Courtney (2017)   | USA       | 2011-2014 | Multi-site          | THA and TKA | Primary | 169,406 | Cardiac disease, Diabetes, History of stroke, Preoperative creatinine >1.5mg/dL                           | 30 day complications (SSI, pneumonia, respiratory, pulmonary embolism, DVT, stroke, cardiac arrest, renal failure, UTI, sepsis, septic shock), 30 day readmissions |
| Deegan (2014)     | USA       | 2004-2011 | Single-site         | THA and TKA | NS      | 779     | Chronic Kidney Disease                                                                                    | Death, Infections, Revisions                                                                                                                                       |
| Deleuran (2015)   | Denmark   | 1995-2001 | Administrative data | THA and TKA | Primary | 109,522 | Liver cirrhosis                                                                                           | Deep prosthetic infection, Intraoperative complications, Mortality within 30 days<br>Readmission within 30 days, Revision in one year                              |
| Dowsey (2009)     | Australia | 1998-2005 | Single-site         | TKA         | Primary | 1,214   | Cardiovascular disease, Diabetes, Respiratory diseases                                                    | Deep Infection                                                                                                                                                     |
| Erkocak (2016)    | USA       | 2000-2012 | Single-site         | THA and TKA | NS      | 1077    | Chronic Renal failure                                                                                     | Surgical site infections, In-hospital mortality                                                                                                                    |
| Gandhi (2009)     | Canada    | 1998-2006 | Single-site         | TKA         | NS      | 1,460   | Diabetes, Hypertension                                                                                    | DVT within 3 months                                                                                                                                                |
| Gaston (2007)     | UK        | 1998-2006 | Single-site         | THA         | Primary | 1,744   | Cerebrovascular disease, CHF, COPD, Diabetes                                                              | Mortality within 3mths after admission                                                                                                                             |
| Huddleston (2009) | USA       | 2002-2004 | Multi-site          | TKA         | NS      | 2,033   | Diabetes                                                                                                  | Adverse events (deep infections, necrosis, nerve injury, dislocation, cardiovascular complication, periprosthetic fracture, Revision, UTI, DVT, Pneumonia, Death)  |
| Hunt (2013)       | UK        | 2003-2011 | Joint registry      | THA         | NS      | 409,096 | CHF, PVD, CVD, Chronic Pulmonary disease, Diabetes without complications, Renal disease, Cancer, Dementia | 90-day mortality                                                                                                                                                   |
| Hunt (2014)       | UK        | 2003-2011 | Joint registry      | TKA         | NS      | 467,779 | CHF, PVD, CVD, Chronic Pulmonary disease, Diabetes without complications, Renal disease, Cancer, Dementia | 45-day mortality                                                                                                                                                   |
| Inacio (2016)     | Australia | 2001-2012 | Administrative data | THA         | NS      | 30820   | Liver disease, CHF, Renal disease, Parkinson's disease, Dementia,                                         | 90-day mortality, 1-year mortality                                                                                                                                 |

|                   |         |           |                                      |                                       |                    |         |                                                                                                        |                                                                                                                                                                                                                                                       |
|-------------------|---------|-----------|--------------------------------------|---------------------------------------|--------------------|---------|--------------------------------------------------------------------------------------------------------|-------------------------------------------------------------------------------------------------------------------------------------------------------------------------------------------------------------------------------------------------------|
|                   |         |           |                                      |                                       |                    |         | Chronic airway disease, Solid tumour without metastasis                                                |                                                                                                                                                                                                                                                       |
| Iorio (2012)      | USA     | 2004-2009 | Single-site                          | THA and TKA                           | Primary            | 1,529   | Diabetes                                                                                               | Infection                                                                                                                                                                                                                                             |
| Jain (2005)       | USA     | 1988-2000 | Administrative data                  | THA and TKA and shoulder arthroplasty | Primary            | 959,839 | Diabetes, Hypertension                                                                                 | Complications (infections, wound infections, pulmonary embolism, thrombophlebitis, vascular complications, other)                                                                                                                                     |
| Jamsen (2013)     | Finland | 1998-2008 | Joint registry                       | THA and TKA                           | Primary            | 96,754  | Cancer, CHD, Depression, Diabetes, Hypertension (without CVD), Pulmonary disease                       | Risk of Revision surgery                                                                                                                                                                                                                              |
| Jamsen (2014)     | Finland | 1998-2009 | Administrative data + Joint registry | THA and TKA                           | Primary            | 3,428   | Parkinson's disease                                                                                    | Infection at 1 year, Mortality > 1 year<br>Revisions in 0-2 years postoperative                                                                                                                                                                       |
| Jamsen (2015)     | Finland | 1998-2009 | Administrative data + Joint registry | THA and TKA                           | Primary            | 4,526   | Alzheimer's disease                                                                                    | Mortality after 10 years, Rate of surgical site infection, Risk of Revision                                                                                                                                                                           |
| Jorgensen (2015a) | Denmark | 2010-2012 | Multi-site                           | THA and TKA                           | Primary            | 8,757   | Cardiovascular disease, Pulmonary disease                                                              | 90-day readmission                                                                                                                                                                                                                                    |
| Jorgensen (2015b) | Denmark | 2010-2012 | Multi-site                           | THA and TKA                           | Primary            | 8,055   | Diabetes Type II                                                                                       | "Diabetes-related morbidity" (cardiac arrhythmias, acute congestive heart failure, MI, prosthetic or wound infections, renal insufficiency, cerebral attacks, pneumonia, UTI>4days, dysregulated blood glucose, other infections), 90-day readmission |
| Judge (2012)      | UK      | 1993-1995 | Multisite                            | THA                                   | NS                 | 282     | Diabetes                                                                                               | SF-36 Physical functioning                                                                                                                                                                                                                            |
| Kapoor (2010)     | USA     | 2003-2006 | Administrative data                  | THA and TKA                           | Primary            | 316,671 | COPD, CAD, Cerebrovascular disease, Diabetes                                                           | Venous Thromboembolism                                                                                                                                                                                                                                |
| Kapoor (2013)     | USA     | 2002-2009 | Administrative data                  | THA and TKA                           | Primary & Revision | 24,051  | COPD, CAD, Cerebrovascular disease, Diabetes                                                           | Venous Thromboembolism                                                                                                                                                                                                                                |
| Karam (2015)      | USA     | 2000-2011 | Single-site                          | THA and TKA                           | Primary & Revision | 26,415  | Cancer                                                                                                 | Deep vein thrombosis, Mortality<br>Overall in-hospital complications, Periprosthetic joint infection                                                                                                                                                  |
| Keswani (2016)    | USA     | 2011-2013 | Multi-site                           | THA and TKA                           | Revision           | 10,112  | Disseminated cancer, Cardiac disease, Diabetes, Renal disease, Stroke, Hypertension, Pulmonary disease | 30-day readmissions                                                                                                                                                                                                                                   |

|                 |         |           |                     |             |                    |           |                                                                         |                                                                                                            |
|-----------------|---------|-----------|---------------------|-------------|--------------------|-----------|-------------------------------------------------------------------------|------------------------------------------------------------------------------------------------------------|
| Kildow (2017)   | USA     | 2005-2012 | Multi-site          | THA         | NS                 | 61,778    | Diabetes                                                                | DVT- 30 days, Prosthetic Joint infection - 90 days, THA Revision - 2-years                                 |
| Kuo (2017)      | Taiwan  | 2009-2012 | Single-site         | TKA         | Primary            | 615       | Chronic Kidney Disease                                                  | 30-day readmissions                                                                                        |
| Lee (2017)      | Korea   | 2004-2013 | Single-site         | TKA         | Primary            | 3,049     | Diabetes, Hypertension                                                  | 90-day readmission                                                                                         |
| Liao (2016)     | Taiwan  | 2004-2008 | Administrative data | THA         | NS                 | 2,426     | Cardiovascular disease, CVA, Chronic Kidney disease, COPD, Hypertension | 1-year mortality, 30-day readmissions                                                                      |
| Marchant (2009) | USA     | 1988-2005 | Administrative data | THA and TKA | Primary & Revision | 1,030,013 | Controlled diabetes                                                     | DVT, Died, Infection                                                                                       |
| Martinez (2013) | Spain   | 2001-2008 | Administrative data | THA and TKA | Primary            | 373,131   | Diabetes                                                                | In-hospital mortality                                                                                      |
| Mazoch (2009)   | USA     | 2004-2012 | Single-site         | THA and TKA | Revision           | 130       | Diabetes                                                                | All complications, Infection                                                                               |
| McCleery (2010) | UK      | 1985-2008 | Joint registry      | TKA         | NS                 | 59,288    | Renal failure                                                           | Early infection (<90 days), Late Revision                                                                  |
| Meding (2003)   | USA     | 1987-1999 | Single-site         | TKA         | Primary            | 5,220     | Diabetes                                                                | Deep Infection, DVT, Knee Society Pain score - 1yr                                                         |
| Menendez (2016) | USA     | 2002-2011 | Multi-site          | THA and TKA | Primary            | 6,054,344 | Multiple Myeloma                                                        | In-hospital mortality, SSI, Thromboembolic events                                                          |
| Miric (2014a)   | USA     | 2005-2010 | Joint registry      | TKA         | Primary            | 41,852    | Chronic Renal Disease                                                   | DVT, Mortality (anytime), Mortality within 90 days, Readmission within 90 days, Revision, SSI deep         |
| Miric (2014b)   | USA     | 2006-2010 | Joint registry      | THA         | Primary            | 20,720    | Chronic Kidney Disease                                                  | DVT, Mortality (anytime), Mortality within 90 days, Readmission within 90 days, Revision (any), SSI (any)  |
| Moon (2008)     | Korea   | 1995-2004 | Single-site         | TKA         | Primary            | 1,581     | Diabetes                                                                | Deep joint infection, DVT, Knee Society Score – function, Knee Society Score – Pain, Overall complications |
| Pedersen (2010) | Denmark | 1996-2005 | Joint registry      | THA         | Primary            | 57,575    | Diabetes                                                                | Overall Revisions                                                                                          |
| Perez (2014)    | Spain   | NS        | Single-site         | TKA         | NS                 | 736       | Depression                                                              | SF-36 Physical component scores, WOMAC score                                                               |
| Radkte (2016)   | Germany | 2011-2012 | Single-site         | THA         | Primary            | 498       | Cancer, Depression, Diabetes                                            | Periprosthetic joint infection                                                                             |
| Rajamaki (2015) | Finland | 2009-2011 | Single-site         | THA and TKA | Primary            | 134       | Glucose metabolism abnormalities                                        | Persistent Pain                                                                                            |

|                    |             |           |                     |             |                      |           |                                                                                                               |                                                                                                                                               |
|--------------------|-------------|-----------|---------------------|-------------|----------------------|-----------|---------------------------------------------------------------------------------------------------------------|-----------------------------------------------------------------------------------------------------------------------------------------------|
| Rasouli (2016)     | USA         | 2009-2009 | Single-site         | THA and TKA | Primary & Revision   | 1,969     | Depression                                                                                                    | Surgical complications                                                                                                                        |
| Robertson (2012)   | UK          | 1989-2002 | Single-site         | TKA         | NS                   | 734       | Diabetes                                                                                                      | Knee Society knee score year 1                                                                                                                |
| Sanders (2012)     | UK          | 2006-2010 | Administrative data | THA and TKA | Primary              | 414,985   | Cancer, Diabetes, Heart Failure, Hypertension, Liver disease, PVD, Renal failure, Respiratory disease, Stroke | In-hospital mortality, Readmission                                                                                                            |
| Seol (2017)        | South Korea | 2007-2015 | Multi-site          | THA and TKA | Primary              | 143       | Liver Cirrhosis                                                                                               | Infections, Medical complications                                                                                                             |
| Sikora-Klak (2017) | USA         | 2012-2014 | Single-site         | THA and TKA | Primary              | 2,914     | Diabetes                                                                                                      | 90-day readmission                                                                                                                            |
| Singh (2014a)      | USA         | 1993-2005 | Joint registry      | TKA         | Primary and Revision | 8,672     | Depression                                                                                                    | Knee status: much better 2- years                                                                                                             |
| Singh (2009)       | USA         | 1993-2005 | Joint registry      | THA         | Revision             | 2,687     | Depression                                                                                                    | Moderate-Severe ADL limitation - 2 years<br>Moderate-severe pain - 2 years                                                                    |
| Singh (2014b)      | USA         | 1993-2005 | Joint registry      | TKA         | Primary & Revision   | 7,139     | Cerebrovascular disease                                                                                       | Moderate-Severe ADL limitation - 2 years<br>Moderate-severe pain - 2 years                                                                    |
| Singh (2013a)      | USA         | 1993-2005 | Joint registry      | THA         | Primary & Revision   | 8,394     | COPD, Diabetes, Heart disease, PVD, Renal disease                                                             | Moderate-severe pain at 2 years                                                                                                               |
| Singh (2013b)      | USA         | 1993-2005 | Joint registry      | TKA         | Primary              | 7,139     | Diabetes without complications                                                                                | Moderate-severe ADL limitation 2 -years                                                                                                       |
| Singh (2013c)      | USA         | 1993-2005 | Joint registry      | TKA         | Primary              | 8,672     | COPD, Depression, Diabetes, Heart disease, PVD, Renal disease                                                 | Moderate-severe pain at 2 years                                                                                                               |
| Singh (2014)       | USA         | 1993-2005 | Joint registry      | TKA         | Revision             | 1,533     | Depression                                                                                                    | Moderate-severe pain at 2 years                                                                                                               |
| Stundner (2013)    | USA         | 2000-2008 | Administrative data | THA and TKA | Primary              | 1,212,493 | Depression                                                                                                    | In-hospital mortality, Major complications, Sepsis, Venous Thromboembolism                                                                    |
| Tiberi (2014)      | USA         | 2000-2012 | Single-site         | THA and TKA | NS                   | 230       | Liver cirrhosis                                                                                               | Infections within 90 days, Mortality most recent follow-up, Mortality within 90 days, Readmissions 90 days, Revision surgery during follow up |
| Vannini (1984)     | Italy       | 1969-1979 | Single-site         | THA         | NS                   | 1,227     | Diabetes                                                                                                      | Post-surgery infections                                                                                                                       |

|              |       |           |                     |             |         |        |                             |                       |
|--------------|-------|-----------|---------------------|-------------|---------|--------|-----------------------------|-----------------------|
| Wang (2013)  | China | 2003-2011 | Single-site         | TKA         | NS      | 245    | CHD, Diabetes, Hypertension | DVT                   |
| Warth (2015) | USA   | 2006-2012 | Administrative data | THA and TKA | Primary | 74,300 | Chronic Renal disease       | Overall complications |
| Zhao (2014)  | China | 2011-2013 | Single-site         | TKA         | NS      | 358    | Diabetes, Hypertension      | DVT within 14 days    |

*Note.* NS = not stated; THA = Total Hip Arthroplasty; TKA = Total Knee Arthroplasty; PVD = Peripheral Vascular Disease; COPD = Chronic Obstructive Pulmonary Disorder; CAD = Coronary Artery Disease ; CHD = Coronary Heart Disease ; CHF = Coronary Heart Failure; CVA/CVD = Cerebrovascular Accident/Disease; SF-36= Short-form 36; WOMAC = Western Ontario and McMaster Universities Osteoarthritis Index; OKS = Oxford Knee Score; SF-12 = Short-form 12; SSI = Surgical Site Infection; DVT = Deep Vein Thrombosis; UTI = Uterine Infection; MI = Myocardial Infarction.
